# Supplementary material for: Red-shifting mutation of light-driven sodium-pump rhodopsin
Source: PubMed Central journal article supplement (PMC6491443; doi:10.1038/s41467-019-10000-x), 2019-04-30
Supplement: 41467_2019_10000_MOESM1_ESM.pdf [file 41467_2019_10000_MOESM1_ESM.pdf]

# **Supporting Information:**

## **Red-shifting Mutation of Light-driven Sodium Pump Rhodopsin**

Inoue et al.

**Supplementary Table 1. Observed vs computed vertical excitation energies  $\Delta E_{S1-S0}$  (kcal/mol) and maximum absorption wavelengths ( $\lambda_{max}$ ) for KR2 WT and its mutants P219G, P219T, S254A, and P219T/S254A; ARM models computed at CASPT2//CASSCF(12,12)/6-31G\*/AMBER level of theory. The oscillator strength ( $f_{osc}$ ) for  $S_0 \rightarrow S_1$  and  $S_0 \rightarrow S_2$  transitions and standard deviation (DEV.ST) are also shown.**

| Sample             | Obs. $\Delta E_{S1-S0}$<br>( $\lambda_{max}$ ) | Comp. $\Delta E_{S1-S0}$<br>( $\lambda_{max}$ ) | $f_{osc} S_0-S_1$ | $f_{osc} S_0-S_2$ | Error | DEV.ST |
|--------------------|------------------------------------------------|-------------------------------------------------|-------------------|-------------------|-------|--------|
| <b>KR2 WT</b>      | 54.4 (525)                                     | 55.2 (517)                                      | 1.06              | 0.43              | 0.8   | 0.2415 |
| <b>P219G</b>       | 53.4 (535)                                     | 54.3 (526)                                      | 1.01              | 0.40              | 0.9   | 0.1838 |
| <b>P219T</b>       | 52.7 (542)                                     | 53.5 (534)                                      | 1.05              | 0.42              | 0.8   | 0.4423 |
| <b>S254A</b>       | 52.4 (545)                                     | 53.1 (538)                                      | 1.00              | 0.41              | 0.7   | 0.3838 |
| <b>P219T/S254A</b> | 50.6 (565)                                     | 51.5 (555)                                      | 1.12              | 0.46              | 0.9   | 0.5638 |

**Supplementary Table 2. Computed 3-root CASPT2//CASSCF(12,12)/6-31G\*/AMBER vertical excitation energies  $\Delta E_{S1-S0}$  (kcal/mol) of KR2 WT and P219G, P219T, S254A, P219T/S254A mutants, computed when the amino acids were turned off individually and also concurrently.**

| Sample             | Computed $E_{S0}$ (a.u.) | Computed $E_{S1}$ (a.u.) | $\Delta E_{S1-S0}$<br>(kcal/mol) | $\Delta E_{off}$<br>(kcal/mol) | $\Delta \Delta E = \Delta E_{S1-S0} - \Delta E_{off}$<br>(kcal/mol) |
|--------------------|--------------------------|--------------------------|----------------------------------|--------------------------------|---------------------------------------------------------------------|
| <b>KR2 WT</b>      | -872.002324              | -871.914423              | 55.2                             |                                |                                                                     |
| P219 OFF           | -872.005518              | -871.919671              |                                  | 53.9                           | +1.3                                                                |
| S254 OFF           | -871.993035              | -871.909239              |                                  | 52.6                           | +2.6                                                                |
| Both OFF           | -871.984483              | -871.901750              |                                  | 51.9                           | +3.2                                                                |
| <b>P219G</b>       | -872.004081              | -871.917494              | 54.3                             |                                |                                                                     |
| G219 OFF           | -872.000409              | -871.910690              |                                  | 56.3                           | -2.0                                                                |
| S254 OFF           | -872.001467              | -871.918690              |                                  | 51.9                           | +2.4                                                                |
| Both OFF           | -871.987028              | -871.896631              |                                  | 56.7                           | -2.4                                                                |
| <b>P219T</b>       | -872.004267              | -871.919068              | 53.5                             |                                |                                                                     |
| T219 OFF           | -872.000397              | -871.911704              |                                  | 55.7                           | -2.2                                                                |
| S254 OFF           | -872.001308              | -871.920153              |                                  | 50.9                           | +2.5                                                                |
| Both OFF           | -871.986901              | -871.897137              |                                  | 56.3                           | -2.9                                                                |
| <b>S254A</b>       | -871.998014              | -871.913387              | 53.1                             |                                |                                                                     |
| P219 OFF           | -872.010538              | -871.930712              |                                  | 50.1                           | +3.0                                                                |
| A254 OFF           | -872.019812              | -871.928719              |                                  | 57.2                           | -4.1                                                                |
| Both OFF           | -872.020781              | -871.929141              |                                  | 57.5                           | -4.4                                                                |
| <b>P219T/S254A</b> | -871.999028              | -871.917009              | 51.5                             |                                |                                                                     |
| T219 OFF           | -871.990471              | -871.904659              |                                  | 53.8                           | -2.4                                                                |
| A254 OFF           | -872.045650              | -871.959600              |                                  | 54.0                           | -2.5                                                                |
| Both OFF           | -872.045994              | -871.953091              |                                  | 58.3                           | -6.8                                                                |

**Supplementary Table 3. Double and single bond lengths (Å) of QM/MM models built with ARM protocol at CASSCF(12,12)/6-31G\*/AMBER level of theory of KR2 WT and its mutants.**

| Bond/Sample | WT    | P219T | S254A | P219T/S254A |
|-------------|-------|-------|-------|-------------|
| C5=C6       | 1.37  | 1.371 | 1.371 | 1.375       |
| C6-C7       | 1.486 | 1.484 | 1.483 | 1.481       |
| C7=C8       | 1.355 | 1.356 | 1.355 | 1.356       |
| C8-C9       | 1.475 | 1.473 | 1.472 | 1.473       |
| C9=C10      | 1.362 | 1.362 | 1.362 | 1.365       |
| C10-C11     | 1.456 | 1.450 | 1.453 | 1.451       |
| C11=C12     | 1.355 | 1.357 | 1.357 | 1.360       |
| C12-C13     | 1.462 | 1.461 | 1.464 | 1.465       |
| C13=C14     | 1.362 | 1.364 | 1.368 | 1.369       |
| C14-C15     | 1.445 | 1.442 | 1.439 | 1.439       |
| C15=N       | 1.289 | 1.288 | 1.288 | 1.290       |

**Supplementary Table 4. Double and single bond lengths (Å) of QM/MM models built with ARM protocol at CASSCF(12,12)/6-31G\*/AMBER level of theory of KR2 WT and its mutants.**

| Dihedral/Sample          | WT      | P219T   | S254A   | P219T/S254A |
|--------------------------|---------|---------|---------|-------------|
| C4-C5=C6-C7              | 172.46  | 171.92  | 172.50  | 171.49      |
| C5=C6-C7=C8              | -175.74 | -174.40 | -174.26 | -175.44     |
| C6-C7=C8-C9              | 173.97  | 173.45  | 173.98  | 173.14      |
| C7=C8-C9=C10             | -172.54 | -173.27 | -172.04 | -173.40     |
| C8-C9=C10-C11            | 170.81  | 170.76  | 171.61  | 170.12      |
| C9=C10-C11=C12           | -178.55 | -177.45 | -178.93 | -177.27     |
| C10-C11=C12-C13          | 162.81  | 162.35  | 161.32  | 160.18      |
| C11=C12-C13=C14          | -171.66 | -172.00 | -170.36 | -169.90     |
| C12-C13=C14-C15          | 151.20  | 151.39  | 150.02  | 149.41      |
| C13=C14-C15=N            | -178.92 | -177.98 | -176.10 | -174.46     |
| C14-C15=N-C <sub>δ</sub> | 159.55  | 159.86  | 157.89  | 152.10      |

**Supplementary Table 5. Total positive charge on the C11H-C12H-C13(Me)-C14H-C15H-NHR moiety (i.e., relevant to the C11=C12 isomerization). In *parenthesis* we also give the charges corresponding to the shorter C13(Me)-C14H-C15H-NHR moiety (i.e., relevant to the C13=C14 isomerization).**

| Protein     | S <sub>0</sub> Charge ( <i>e</i> ) | S <sub>1</sub> Charge ( <i>e</i> ) | S <sub>2</sub> Charge ( <i>e</i> ) |
|-------------|------------------------------------|------------------------------------|------------------------------------|
| KR2 WT      | 0.83 (0.78)                        | 0.45 (0.42)                        | 0.74 (0.70)                        |
| P219G       | 0.85 (0.80)                        | 0.42 (0.39)                        | 0.76 (0.72)                        |
| P219T       | 0.84 (0.78)                        | 0.44 (0.40)                        | 0.74 (0.70)                        |
| S254A       | 0.87 (0.81)                        | 0.41 (0.37)                        | 0.79 (0.73)                        |
| P219T/S254A | 0.81 (0.77)                        | 0.47 (0.45)                        | 0.72 (0.69)                        |

**Supplementary Table 6. List of primers used for the site-directed mutations.**

| Mutation    | Sense primer                            | Anti-sense primer                        |
|-------------|-----------------------------------------|------------------------------------------|
| KR2 L168Y   | CCTGACTGCGTTTTATGTCTGG<br>GGAGCCATTAG   | CTAATGGCTCCCCAGACATAAA<br>ACGCAGTCAGG    |
| KR2 G171S   | GCGTTTCTGGTCTGGAGCGCCA<br>TTAGCAGTGCG   | CGCACTGCTAATGGCGCTCCAG<br>ACCAGAAAACGC   |
| KR2 F178Y   | CATTAGCAGTGC GTTCTATTTTC<br>ACATTCTCTGG | CCAGAGAATGTGAAAATAGAA<br>CGCACTGCTAATG   |
| KR2 G146S   | CAGTTTTGGTTCTCAAGCGCCA<br>TGATGATCATTAC | GTAATGATCATCATGGCGCTTG<br>AGAACCAAAACTG  |
| KR2 M149S   | GTTCTCAGGTGCCATGAGCATC<br>ATTACAGGC     | GCCTGTAATGATGCTCATGGCA<br>CCTGAGAAC      |
| KR2 I150T   | CTCAGGTGCCATGATGACCATT<br>ACAGGCTATATC  | GATATAGCCTGTAATGGTCATC<br>ATGGCACCTGAG   |
| KR2 G153S   | GCCATGATGATCATTACAAGCT<br>ATATCGGACAG   | CTGTCCGATATAGCTTGTAATG<br>ATCATCATGGC    |
| KR2 G156S   | CATTACAGGCTATATCAGCCAG<br>TTTTACGAAGTG  | CACTTCGTA AAAACTGGCTGATA<br>TAGCCTGTAATG |
| KR2 I181T   | GCGTTCTTCTTTCACACCCTCTG<br>GGTTATGAAG   | CTTCATAACCCAGAGGGTGTGA<br>AAGAAGAACGC    |
| KR2 F211Y   | CAACATCTGGATTCTGTATCTG<br>ATCTCTTGGACG  | CGTCCAAGAGATCAGATACAGA<br>ATCCAGATGTTG   |
| KR2 W215Y   | CTGTTTCTGATCTTTATACGTT<br>GTACCCAGGTG   | CACCTGGGTACAACGTATAAGA<br>GATCAGAAACAG   |
| KR2 P219T   | CTCTTGACGTTGTACACCGGT<br>GCGTATTTAATG   | CATTAAATACGCACCGGTGTAC<br>AACGTCCAAGAG   |
| KR2 P219G   | CTCTTGACGTTGTACGGCGGT<br>GCGTATTTAATG   | CATTAAATACGCACCGCCGTAC<br>AACGTCCAAGAG   |
| KR2 S254A   | TGCAGATGTGTCGGCGAAAGTC<br>ATTTATG       | CATAAATGACTTTCGCCGACAC<br>ATCTGCA        |
| JsNaR G216P | CACCTGGACCATTTACCCGCTG<br>GTGTATCTGGTTC | GAACCAGATACACCAGCGGGT<br>AAATGGTCCAGGTG  |
| JsNaR S247A | CTTTGCGGACGTTACCGCGAAA<br>GCGGTGTTTCGGC | GCCGAACACCGCTTTCGCGGTA<br>ACGTCCGCAAAG   |
| NpHR P226T  | CATGTGGCTCGGCTACACCATC<br>GTGTGGGCACTC  | GAGTGCCACACGATGGTGTAG<br>CCGAGCCACATG    |
| PoXeR P179T | GTTTTGGGTTAGCTATACCCTG<br>GTTTGGCTGATC  | GATCAGCCAAACCAGGGTATAG<br>CTAACCCAAAAC   |

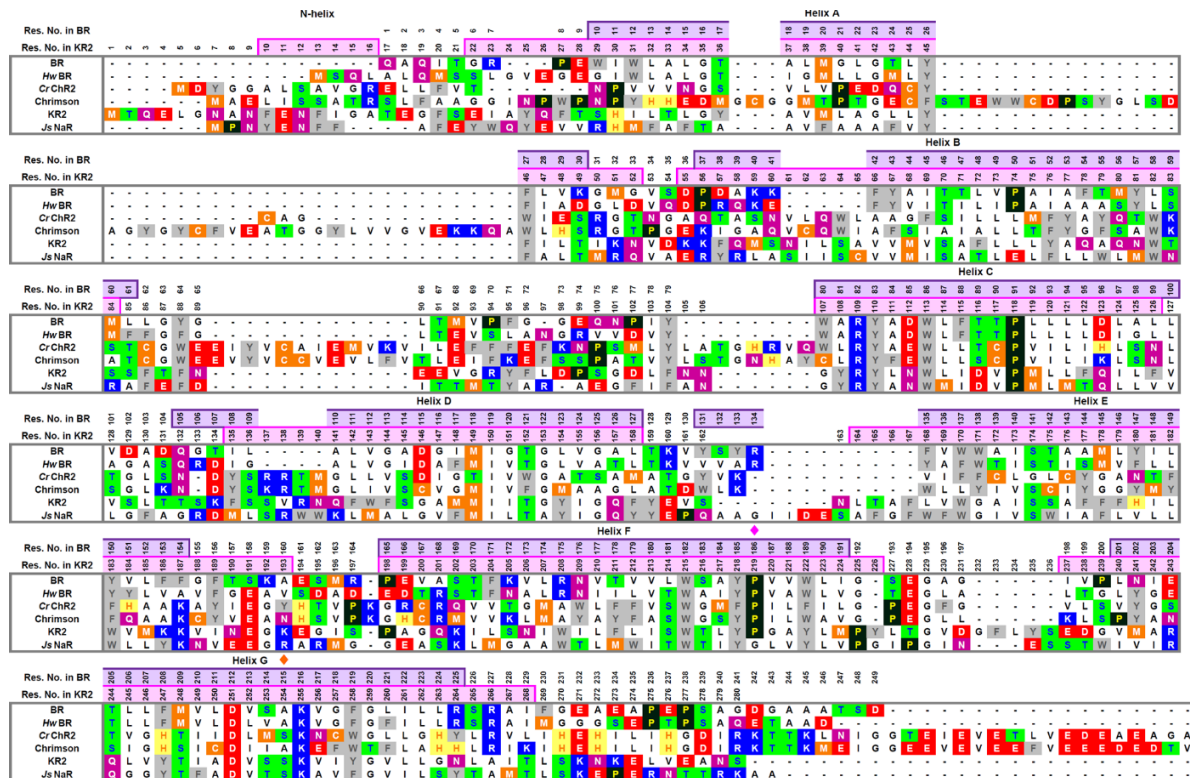

**Supplementary Figure 1. Multiple alignment of amino acid sequences of microbial rhodopsins.** The amino acid sequences were aligned by ClustalW<sup>1</sup> for BR, BR of *Haloquadratum walsbyi* (HwBR), Chr2 without the C-terminal sequence, Chrimson, KR2 and JsNaR. The residue numbers (Res. No.) in BR and KR2 are shown in the first and second row, respectively. Transmembrane helices of BR and KR2 were indicated by purple and pink rectangles, respectively, according to their X-ray crystallographic structures ((PDB code: 1M0L (BR)<sup>2</sup> and 3X3C (KR2)<sup>3</sup>). The positions of KR2 Pro219 and Ser254 are indicated by pink and orange diamonds, respectively.

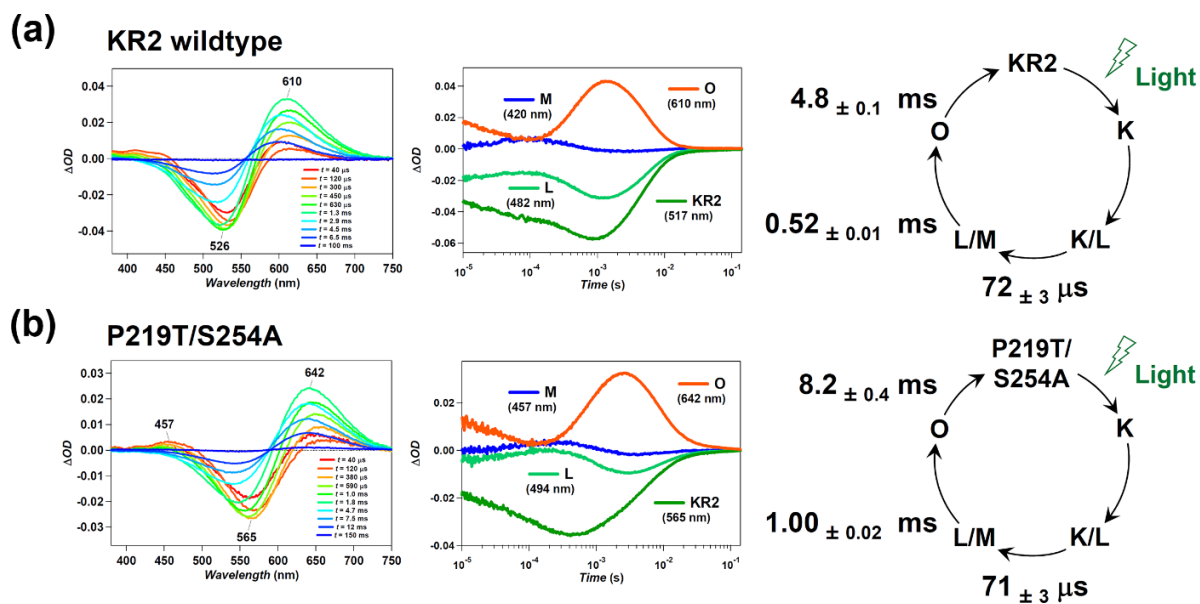

**Supplementary Figure 2. The photocycles of KR2 mutants.** Transient absorption spectra (left), the time evolutions of transient absorption change at specific wavelengths (middle) and the photocycles determined by the curve fitting with multi-exponential functions (right) of KR2 WT (a) and P219T/S254A (b), in POPE/POPG liposome (molar ratio = 3 : 1) with a protein-to-lipid molar ratio of 1:50. The lifetimes and their standard deviations of the photo-intermediates in are indicated in the photocycles. The green, light-green, blue, and orange lines in (b) show the photo-bleaching of the initial state, accumulations of L-, M- and O-intermediates, respectively. Source data are provided as a Source Data file

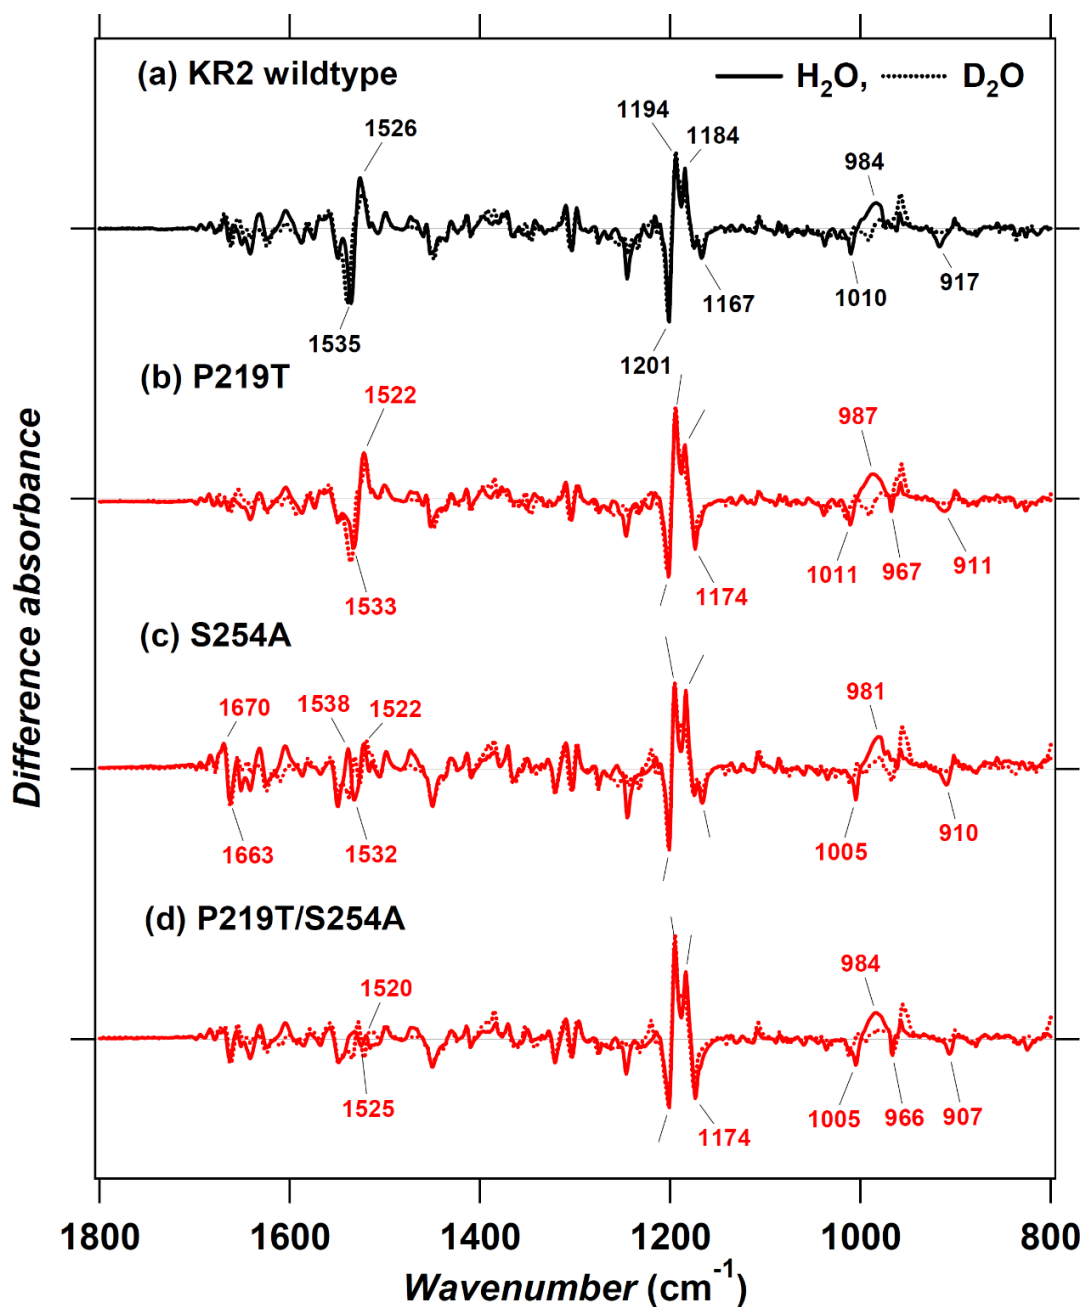

**Supplementary Figure 3. Light-induced infrared absorption changes of KR2 mutants.** Light-induced FTIR difference spectra of (a) KR2 WT (black) and the mutants (red), (b) P219T, (c) S254A and (d) P219T/S254A, in the 1800-800 cm<sup>-1</sup> region at  $T = 77$  K and pH 8.0. Solid and dotted lines represent the samples hydrated with H<sub>2</sub>O and D<sub>2</sub>O, respectively. Source data are provided as a Source Data file



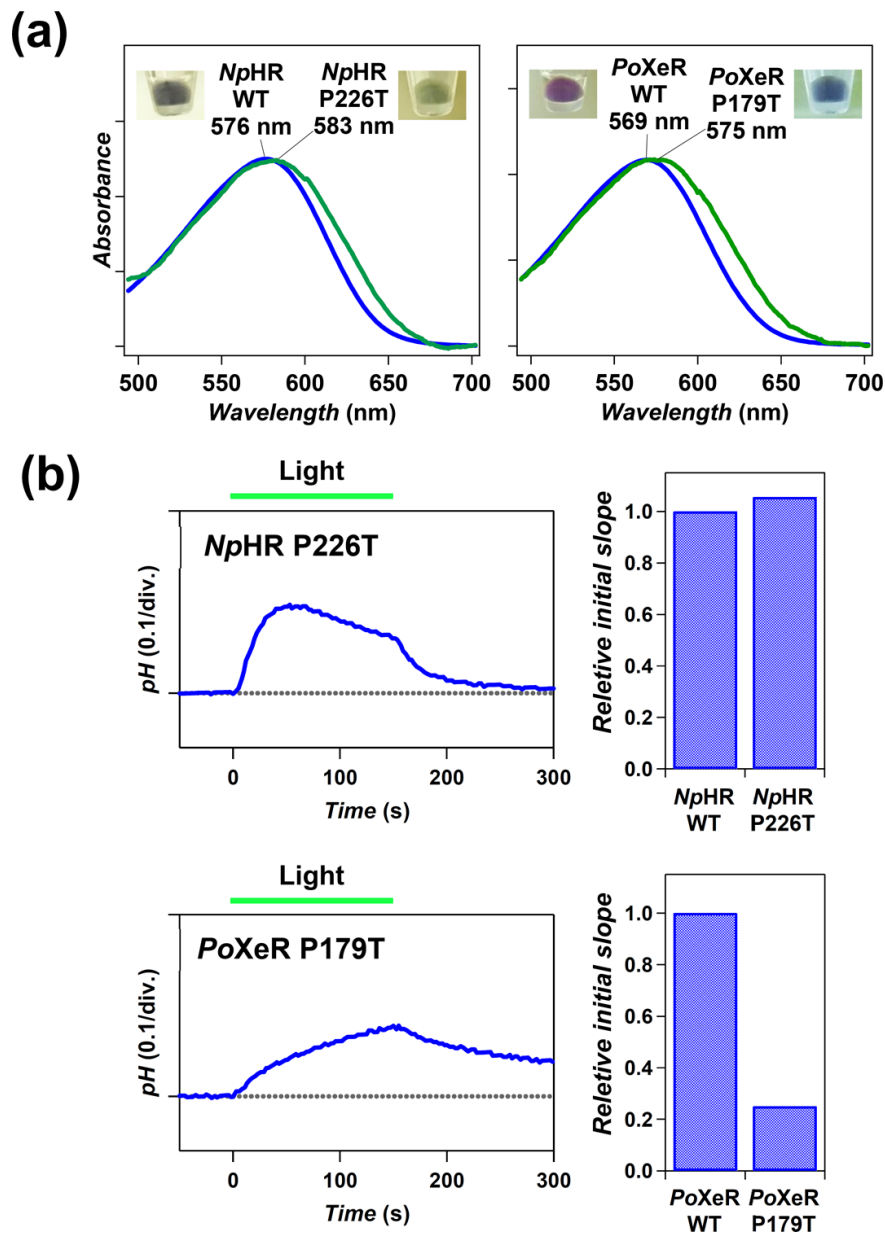

**Supplementary Figure 4. The effect of mutation at the proline corresponding to KR2 Pro219 in the chloride pump (*NpHR*) and inward proton pump (*PoXeR*) rhodopsins.** (a) Absorption spectra of *NpHR* WT, P226T, *PoXeR* WT and P179T. The wildtype and mutant proteins are indicated in blue and green, respectively. (b) Ion pump activity assays by monitoring pH changes in the external media of the suspension of *E. coli* cells expressing *PoXeR* P179T and *NpHR* P226T (left) and the relative initial slopes of each to the wildtype (right). The light was illuminated at  $t = 0-150$  s indicated by light-green bars. Source data are provided as a Source Data file

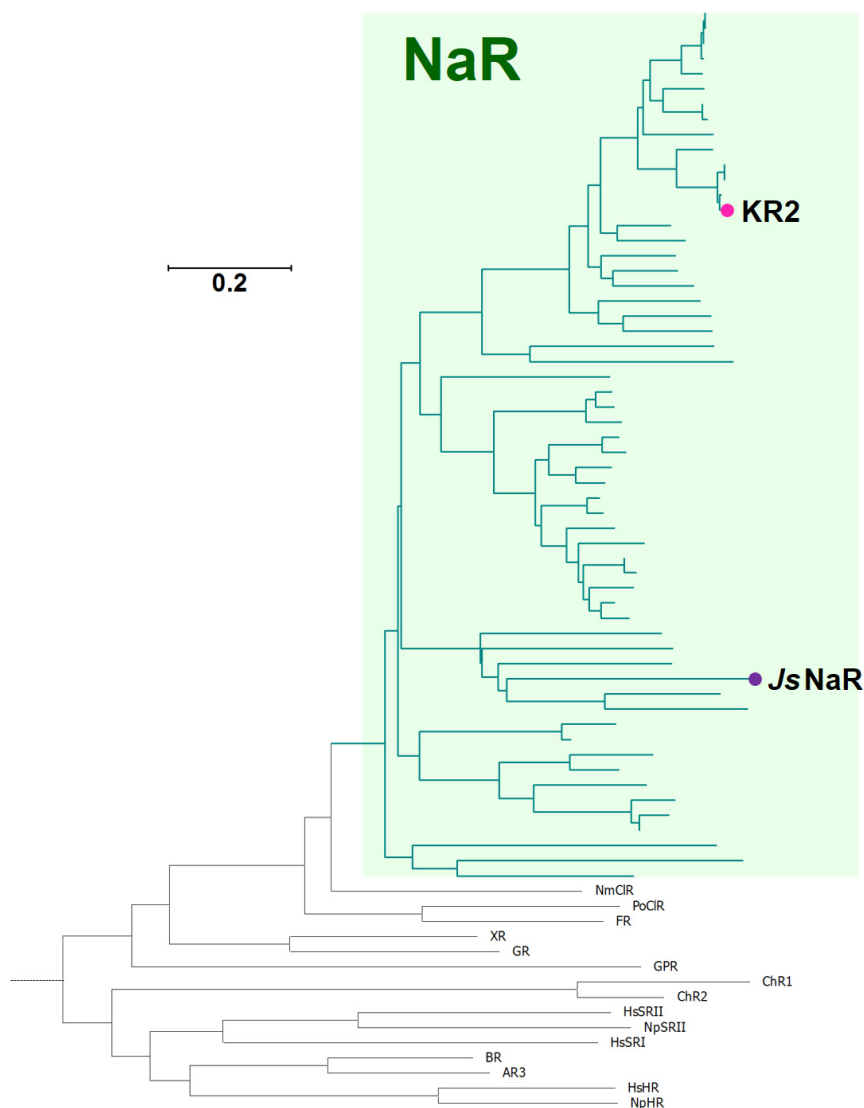

**Supplementary Figure 5. Phylogenetic relationship of KR2 and *JsNaR* in the microbial rhodopsin sub-family.** NaRs are indicated with green branches. The evolutionary history was inferred using the Neighbor-Joining method<sup>4</sup>. The optimal tree with the sum of branch length = 17.62164409 is shown. The tree is drawn to scale, with branch lengths in the same units as those of the evolutionary distances used to infer the phylogenetic tree. The evolutionary distances were computed using the Poisson correction method<sup>5</sup> and are in the units of the number of amino acid substitutions per site. The analysis involved 73 amino acid sequences. All ambiguous positions were removed for each sequence pair. There were a total of 393 positions in the final dataset. Evolutionary analyses were conducted in MEGA6<sup>6</sup>. KR2 and *JsNaR* are indicated by pink and purple circles, respectively.

### Supplementary References

- 1 Thompson, J. D., Higgins, D. G. & Gibson, T. J. Clustal-W - Improving the Sensitivity of Progressive Multiple Sequence Alignment through Sequence Weighting, Position-Specific Gap Penalties and Weight Matrix Choice. *Nucleic Acids Res.* **22**, 4673-4680, (1994).
- 2 Schobert, B., Cupp-Vickery, J., Hornak, V., Smith, S. & Lanyi, J. Crystallographic structure of the K intermediate of bacteriorhodopsin: conservation of free energy after photoisomerization of the retinal. *J. Mol. Biol.* **321**, 715-726, (2002).
- 3 Kato, H. E. *et al.* Structural basis for Na<sup>+</sup> transport mechanism by a light-driven Na<sup>+</sup> pump. *Nature* **521**, 48-53, (2015).
- 4 Saitou, N. & Nei, M. The neighbor-joining method: a new method for reconstructing phylogenetic trees. *Mol. Biol. Evol.* **4**, 406-425, (1987).
- 5 Zuckerkandl, E. & Pauling, L. in *Evolving Genes and Proteins* (eds V. Bryson & H. J. Vogel) 97-166 (Academic Press, New York 1965).
- 6 Tamura, K. *et al.* MEGA5: molecular evolutionary genetics analysis using maximum likelihood, evolutionary distance, and maximum parsimony methods. *Mol. Biol. Evol.* **28**, 2731-2739, (2011).
